# Supplementary material
Source: Springer Nature journal article supplement (https://www.springermedizin.de/resource/supplementary/13063_2012_1257_MOESM2_ESM.pdf/9620474)
Supplement: MOESM2 [file 9620474]

## Screening

All 7-11 years old screened for eligibility at Oral Health Assessment appointment for who require removal of FPMs

Screen failures

- ◆ Refused consent
- ◆ Exclusion criteria

Consented and randomised to study (n=400)

## Allocation

Allocated to control group (n=200)  
• Baseline data collection

Allocated to intervention (n= 200)  
• Baseline data collection

Review  
Participants lost to follow-up (give reasons) (n=10)  
*25% dropout rate over 5 years allowed for*

## 1 Year Follow-Up

Review  
Participants lost to follow-up (give reasons) (n=10)  
*25% dropout rate over 5 years allowed for*

Review  
Participants lost to follow-up (give reasons) (n=50)  
*25% dropout rate over 5 years allowed for*

## Age 14 or 5 Year Follow-Up

Review  
Participants lost to follow-up (give reasons) (n=50)  
*25% dropout rate over 5 years allowed for*

Analysed (n=150)  
◆ Excluded from analysis (give reasons)(n= 50 )

## Analysis

Analysed (n=150)  
◆ Excluded from analysis (give reasons)(n= 50 )
